# Supplementary material for: Autocatalytic demetalation of a Zn(salphen) complex provoked by unprotected N-heterocycles
Source: Royal Society of Chemistry journal article supplement (doi:10.1039/b713039b), 2008-01-01
Supplement: b713039b.pdf [file b713039b.pdf]

**Supporting Information:**

# Unanticipated demetalation of a Zn(salphen) complex provoked by N-heterocycles

*Eduardo C. Escudero-Adán,<sup>§</sup> Jordi Benet-Buchholz,<sup>§</sup> Arjan W. Kleij<sup>§,†\*</sup>*

Institute of Chemical Research of Catalonia (ICIQ), Av. Països Catalans 16, 43007

Tarragona, Spain *and* Institució Catalana de Recerca i Estudis Avançats (ICREA), Pg.

Lluís Companys 23, 08010 Barcelona, Spain

**Contents:**<sup>1</sup>

- Page S2: <sup>1</sup>H NMR spectrum (d<sub>6</sub>-acetone) of Zn(salphen)compound **1a**.  
Page S3: <sup>1</sup>H NMR spectrum (CDCl<sub>3</sub>) of Ni(salphen)compound **1b**.  
Page S4: <sup>1</sup>H NMR spectrum (d<sub>6</sub>-acetone) of Ru(CO)(salphen)compound **1c**.  
Page S5: Typical NMR shifts for compound **1a·4b** as compared to free **4b**.  
Page S6: Crystallographic details for **2**, **1a·4b** and **1a·5b**.  
Page S8: MALDI-TOF-MS spectrum for the product of the reaction between **1a** and purine **3**.  
Page S9: MALDI-TOF-MS spectrum for the product of the reaction between **1a** and imidazole **5a**.  
Page S10: <sup>1</sup>H NMR analysis (d<sub>6</sub>-acetone) of the yellow crystals obtained after reaction of **1a** with purine **3**.  
Page S11: Typical NMR shifts (d<sub>6</sub>-acetone) upon demetalation of complex **1a** in the presence of purine **3** and imidazole **5a**.  
Page S13: Literature pK<sub>a</sub> data for a series of N-heterocyclic compounds.  
Page S14: Full <sup>1</sup>H NMR spectra (d<sub>6</sub>-acetone) of compounds **1a·4b**, **1a·5b** and **1a·7**.  
Page S17: Typical procedure involving complexes **1** and the N-heterocycles **3-7**.

---

<sup>1</sup> All <sup>1</sup>H NMR spectra were recorded at 400 MHz. The CDCl<sub>3</sub> contained TMS as internal standard.

$^1\text{H}$  NMR spectrum ( $\text{d}_6$ -acetone) of Zn(salphen)compound **1a**.

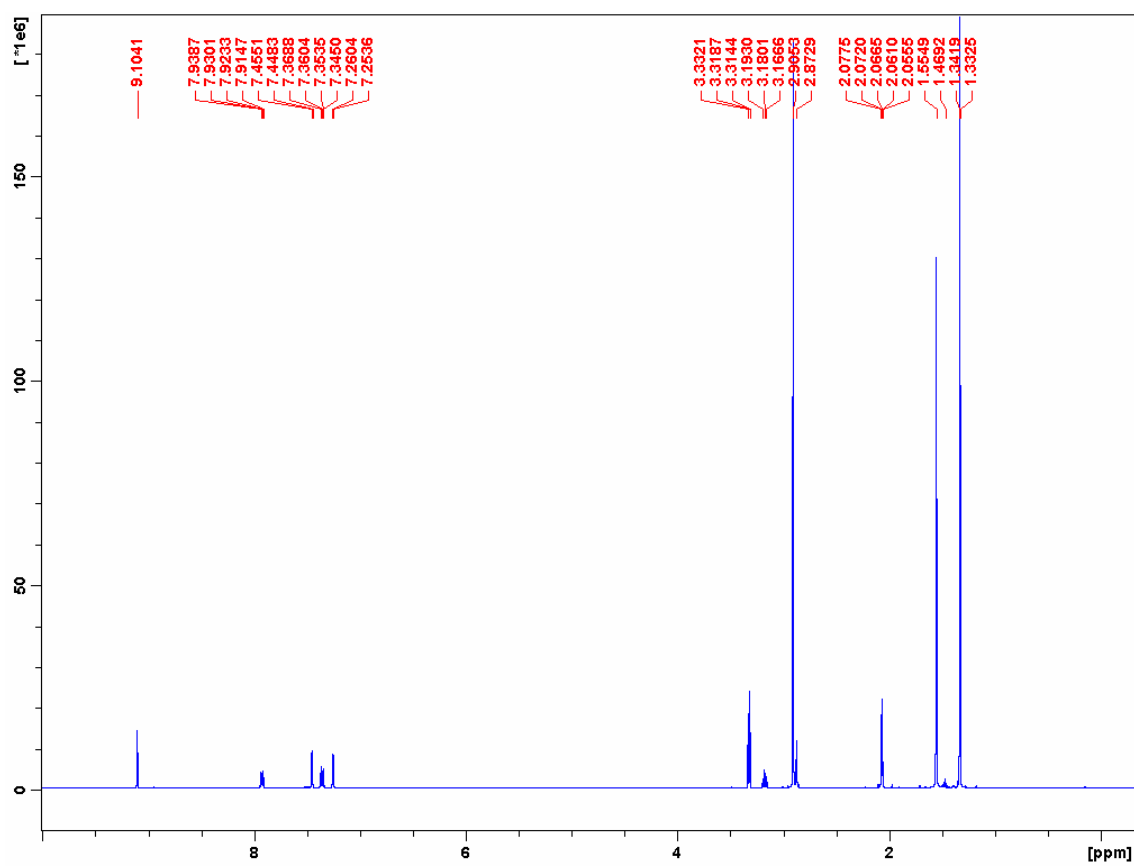

$^1\text{H}$  NMR spectrum ( $\text{CDCl}_3$ ) of Ni(salphen)compound **1b**.

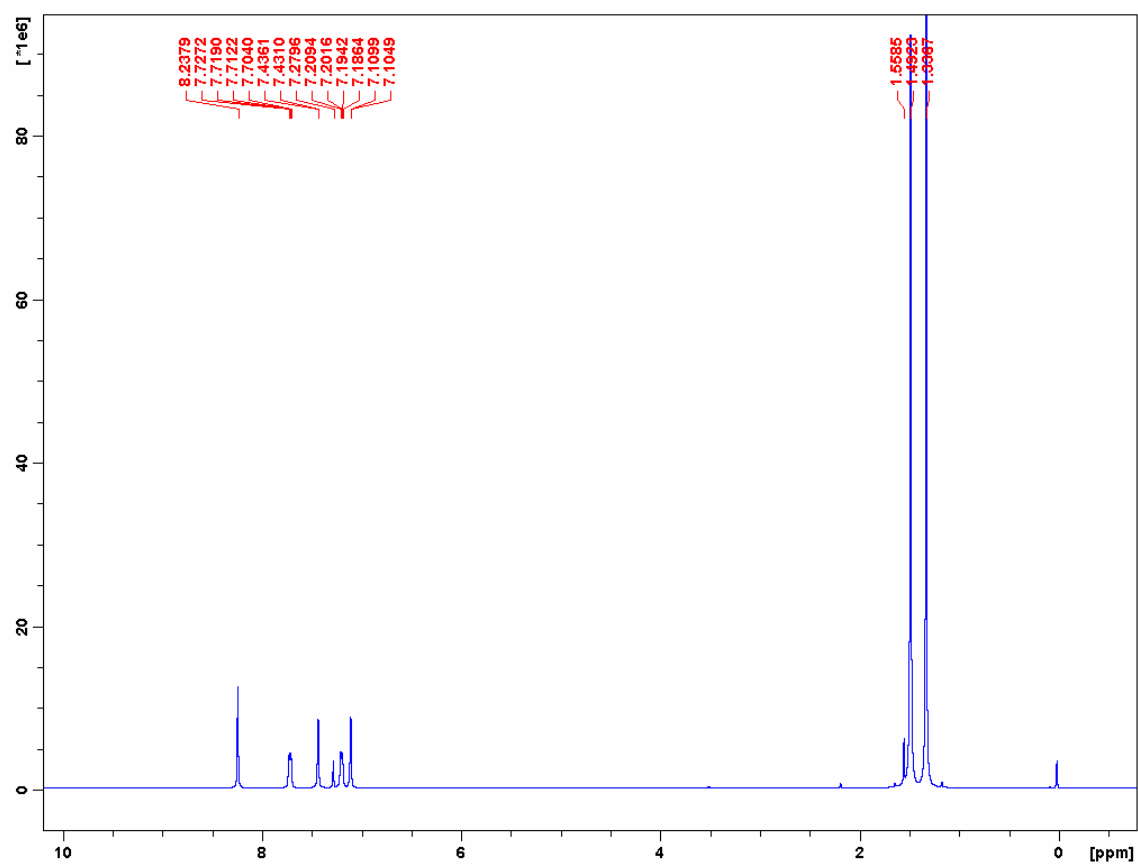

$^1\text{H}$  NMR spectrum ( $\text{d}_6$ -acetone) of  $\text{Ru}(\text{CO})(\text{salphen})$  compound **1c**.

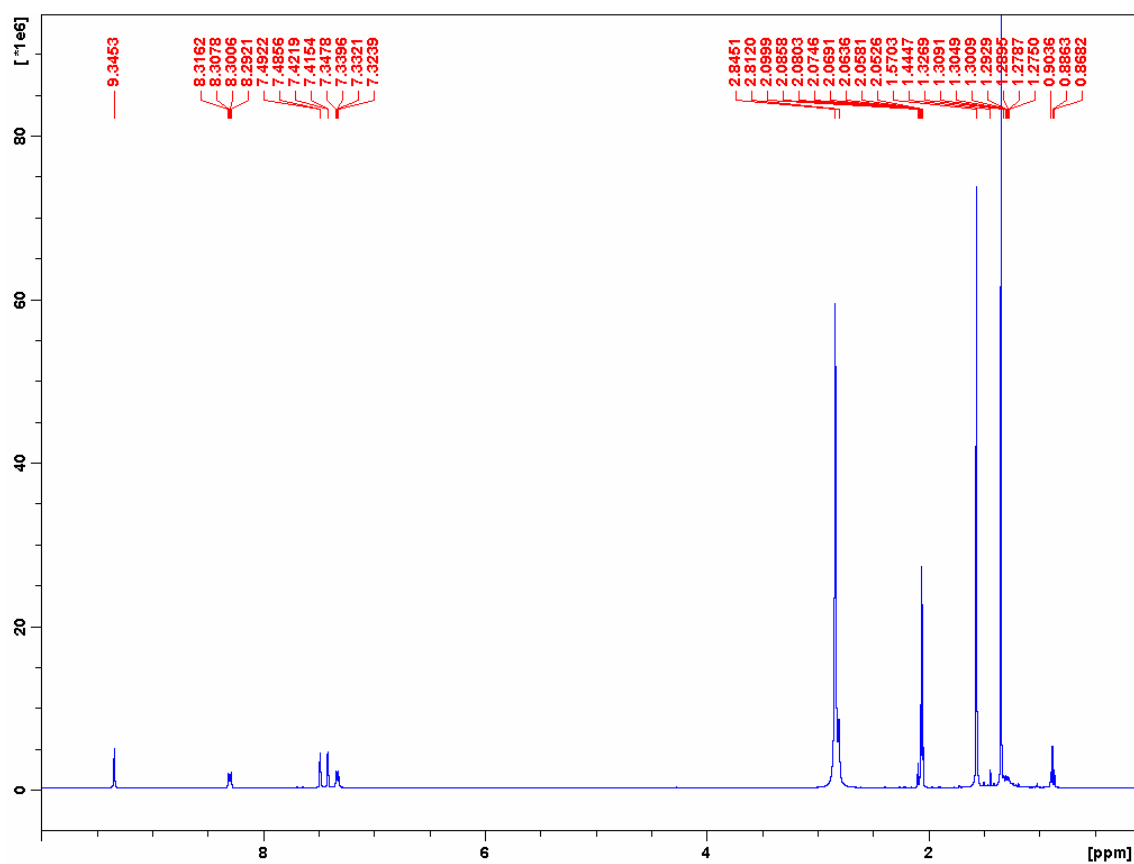



## Crystallographic details for **2**, **1a·4b** and **1a·5b**.

| Compound                               | <b>1a·4b</b>                                                                  | <b>1a·5b</b>                                                                  | <b>2</b>                                                         |
|----------------------------------------|-------------------------------------------------------------------------------|-------------------------------------------------------------------------------|------------------------------------------------------------------|
| <b>Formula</b>                         | C <sub>44</sub> H <sub>54</sub> N <sub>4</sub> O <sub>2</sub> Zn <sub>1</sub> | C <sub>40</sub> H <sub>52</sub> N <sub>4</sub> O <sub>2</sub> Zn <sub>1</sub> | C <sub>78</sub> H <sub>105</sub> N <sub>7</sub> O <sub>4</sub> * |
| <b>Solvents in crystal</b>             | -----                                                                         | -----                                                                         | 3/2 × Acetonitrile*                                              |
| <b>Formula weight</b>                  | 736.28                                                                        | 686.23                                                                        | 1204.69                                                          |
| <b>Crystal size (mm<sup>3</sup>)</b>   | 0.14 × 0.12 × 0.07                                                            | 0.30 × 0.30 × 0.10                                                            | 0.20 × 0.10 × 0.10                                               |
| <b>Crystal color</b>                   | orange                                                                        | yellow                                                                        | orange                                                           |
| <b>Temp (K)</b>                        | 100                                                                           | 100                                                                           | 100                                                              |
| <b>Crystal system</b>                  | triclinic                                                                     | orthorhombic                                                                  | triclinic                                                        |
| <b>Space group</b>                     | <i>P</i> $\bar{1}$                                                            | <i>I</i> bam                                                                  | <i>P</i> $\bar{1}$                                               |
| <b>A (Å)</b>                           | 9.4787(6)                                                                     | 32.9872(19)                                                                   | 9.9668(6)                                                        |
| <b>B (Å)</b>                           | 14.6726(11)                                                                   | 9.8259(6)                                                                     | 11.7206(5)                                                       |
| <b>C (Å)</b>                           | 14.9753(10)                                                                   | 23.0204(13)                                                                   | 33.5724(16)                                                      |
| <b>α (deg)</b>                         | 103.503(4)                                                                    | 90.00                                                                         | 81.394(2)                                                        |
| <b>β (deg)</b>                         | 107.774(3)                                                                    | 90.00                                                                         | 82.282(2)                                                        |
| <b>γ (deg)</b>                         | 91.800(4)                                                                     | 90.00                                                                         | 69.164(2)                                                        |
| <b>V (Å<sup>3</sup>)</b>               | 1916.6(2)                                                                     | 7461.6(8)                                                                     | 3610.1(3)                                                        |
| <b>Z</b>                               | 2                                                                             | 4                                                                             | 2                                                                |
| <b>ρ (g/cm<sup>3</sup>)</b>            | 1.276                                                                         | 1222                                                                          | 1.108                                                            |
| <b>μ (mm<sup>-1</sup>)</b>             | 0.683                                                                         | 0.696                                                                         | 0.068                                                            |
| <b>θ<sub>max</sub> (°)</b>             | 39.97                                                                         | 39.87                                                                         | 35.18                                                            |
| <b>Reflec. measured</b>                | 37644                                                                         | 45014                                                                         | 58825                                                            |
| <b>Unique reflections</b>              | 16419 [R <sub>int</sub> = 0.0288]                                             | 11013 [R <sub>int</sub> = 0.0370]                                             | 29202 [R <sub>int</sub> = 0.0491]                                |
| <b>Absorp. correct.</b>                | SADABS (Bruker)                                                               | SADABS (Bruker)                                                               | SADABS (Bruker)                                                  |
| <b>Trans. min/max</b>                  | 0.8433/1.0000                                                                 | 0.8486/1.0000                                                                 | 0.8123/1.0000                                                    |
| <b>Parameters</b>                      | 473                                                                           | 230                                                                           | 833                                                              |
| <b>R1/wR2 [I&gt;2σ(I)]</b>             | 0.0332/0.0867                                                                 | 0.0307/0.0850                                                                 | 0.0781/0.1862                                                    |
| <b>R1/wR2 [all data]</b>               | 0.0404/0.0905                                                                 | 0.0386/0.0899                                                                 | 0.1219/0.2059                                                    |
| <b>Goodness-of-fit (F<sup>2</sup>)</b> | 1.059                                                                         | 1.033                                                                         | 1.062                                                            |
| <b>Peak/hole (e/Å<sup>3</sup>)</b>     | 0.667/-0.301                                                                  | 0.834/-0.297                                                                  | 0.954/-0.532                                                     |

\* The elementary cell contains two independent molecules of the main compound.

**X-ray Structure Determination:** Crystals of **1a·4b**, **1a·4b** and **2** were obtained from CH<sub>3</sub>CN in the presence of suitable ligands. The measured crystals were prepared under inert conditions immersed in perfluoropolyether as protecting oil for manipulation.

**Data Collection:** Measurements were made on a Bruker-Nonius diffractometer equipped with a APPEX 2 4K CCD area detector, a FR591 rotating anode with MoK $\alpha$  radiation, Montel mirrors as monochromator and a Kryoflex low temperature device ( $T = -173$  °C). Full-sphere data collection was used with  $\omega$  and  $\varphi$  scans. Programs used: Data collection Apex2 V. 1.0-22 (Bruker-Nonius 2004), data reduction Saint + Version 6.22 (Bruker-Nonius 2001) and absorption correction SADABS V. 2.10 (2003).

Structure Solution and Refinement: SHELXTL Version 6.10 (Sheldrick, 2000) was used.<sup>2</sup>

### Comments:

The proposed structure for the **1a·4b** could be elucidated unambiguously by single crystal X-ray diffraction. The compound crystallizes in the triclinic space group  $P\bar{1}$ . The elementary cell contains one molecule of the complex.

The structure of **1a·5b** was proved by X-ray single crystal structure analysis. The compound is crystallizing in the orthorhombic space group  $Ibam$  with a  $C_m$  symmetry for the molecule. The hydrogen atoms at C22 are disordered in two orientations.

After different attempts, the structure of **2** could be solved using tiny crystals obtained from acetonitrile. In sake of the bad quality of the crystals, the structure could be elucidated with enough quality for reporting. Compound **2** crystallizes as an acetonitrile solvate with two independent molecules of the main compound and three independent molecules of acetonitrile in the elementary cell.

### Structure of ligand 2:

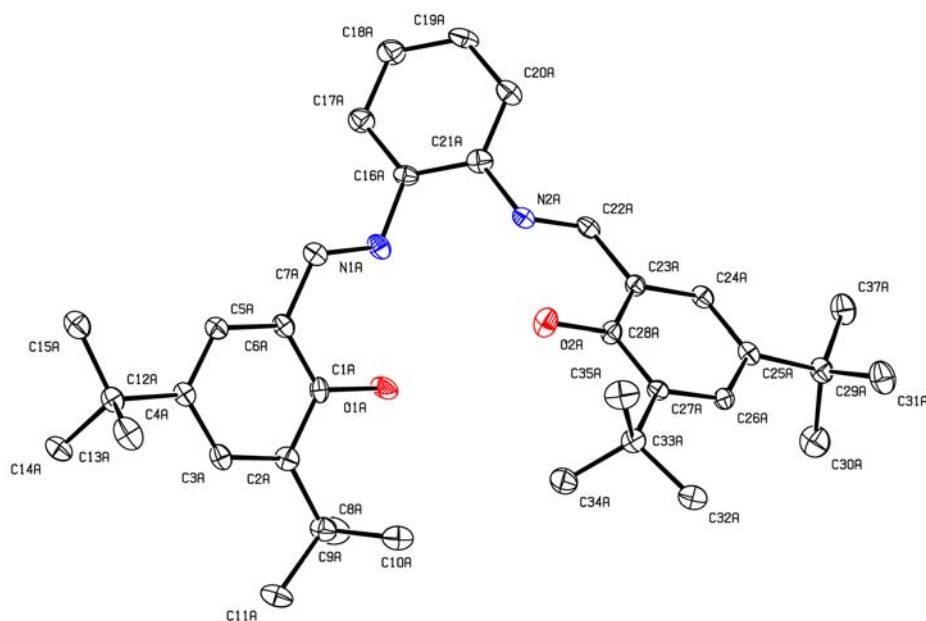

The X-ray molecular structure determined for **2**; hydrogen atoms and co-crystallized solvent molecules are omitted for clarity. Only one of the crystallographically independent molecules is shown.

<sup>2</sup> Sheldrick, G. M., 'SHELXTL Crystallographic System Ver. 5.10', Bruker AXS Inc., Madison, Wisconsin 1998.

MALDI-TOF-MS spectrum for the product of the reaction between **1a** and purine **3**.

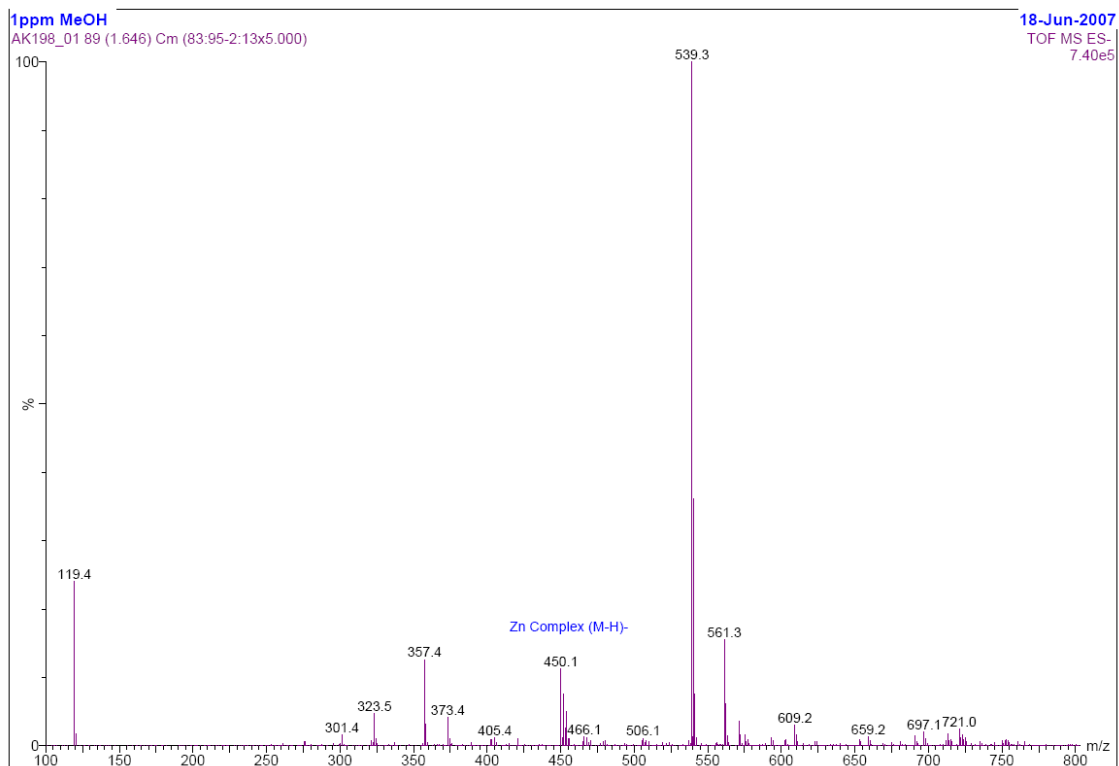

Please note: MS analysis carried out for the mother liquor



MALDI-TOF-MS spectrum for the product of the reaction between **1a** and imidazole **5a**.

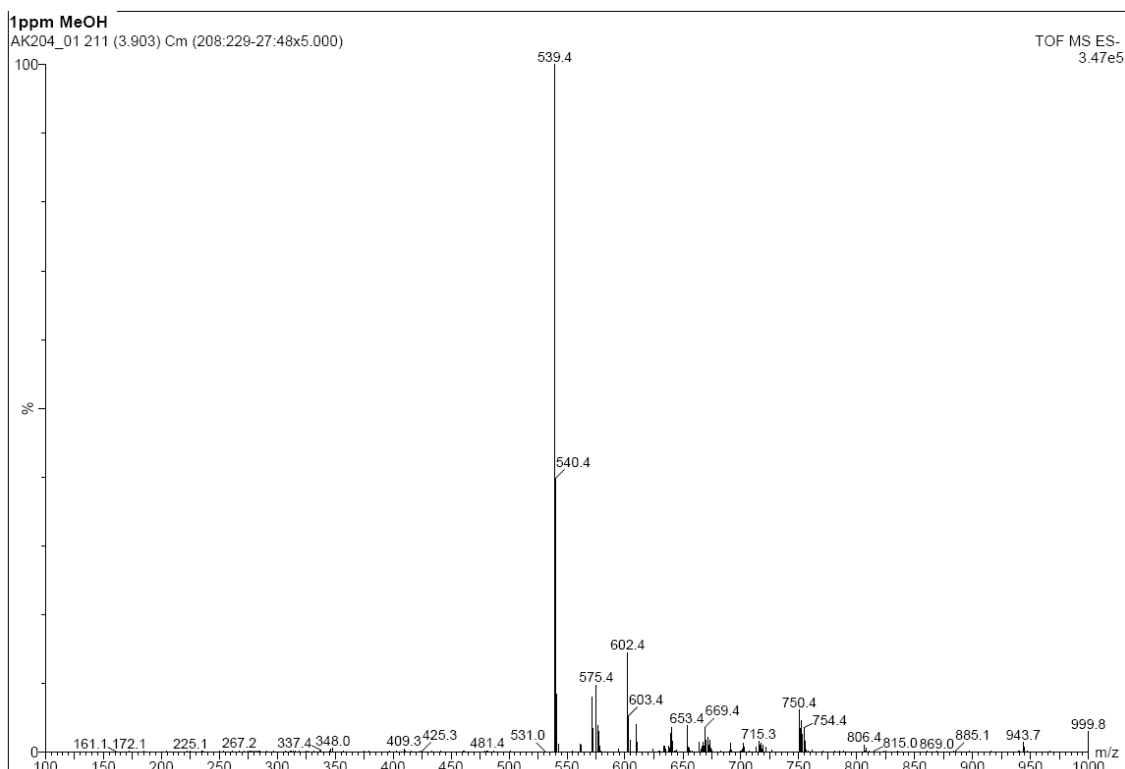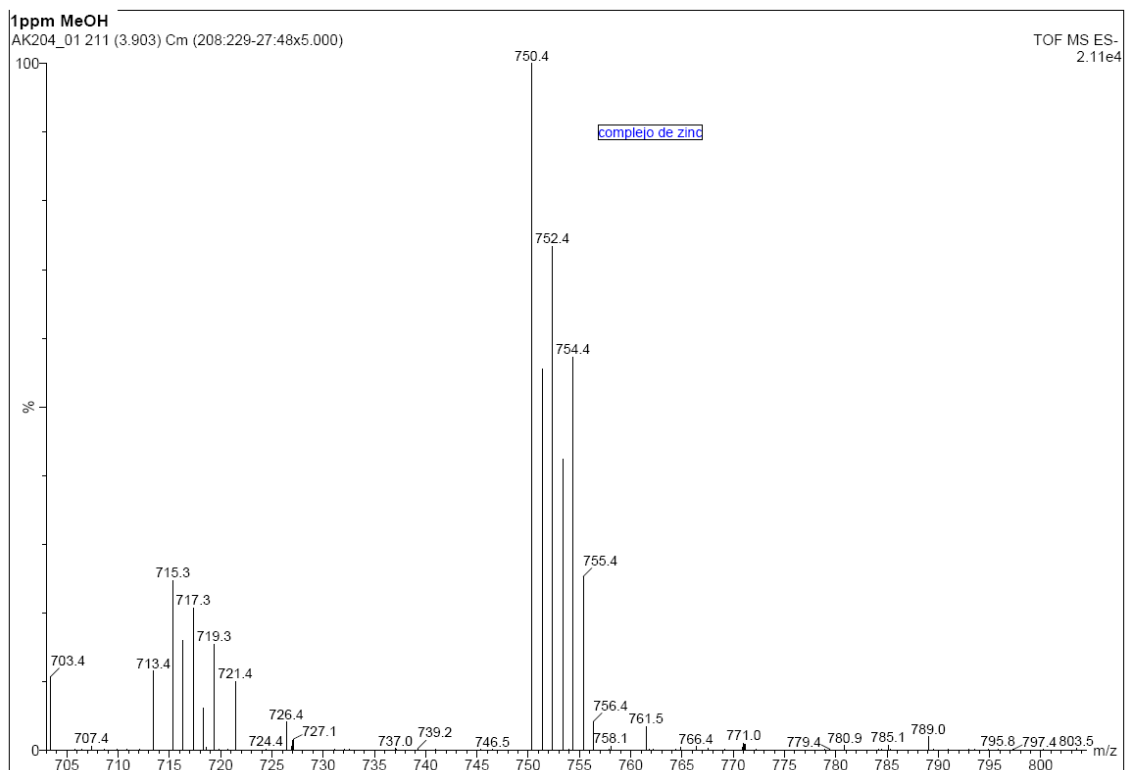

Please note: MS analysis carried out for the mother liquor. An enlargement is presented for part of the higher mass region, showing the presence of mono-Zn species.

<sup>1</sup>H NMR analysis (d<sub>6</sub>-acetone) of the yellow crystals obtained after reaction of **1a** with purine **3**.

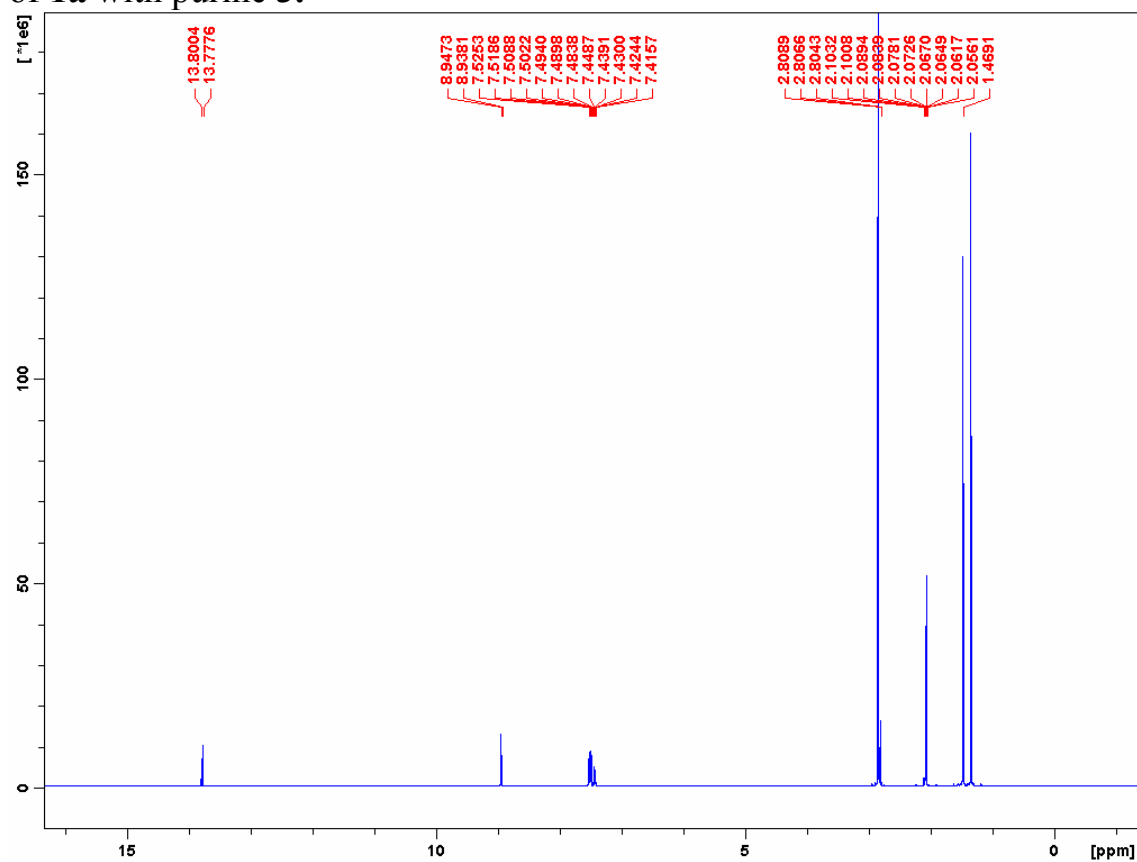

Directly below the spectrum recorded in CDCl<sub>3</sub>:

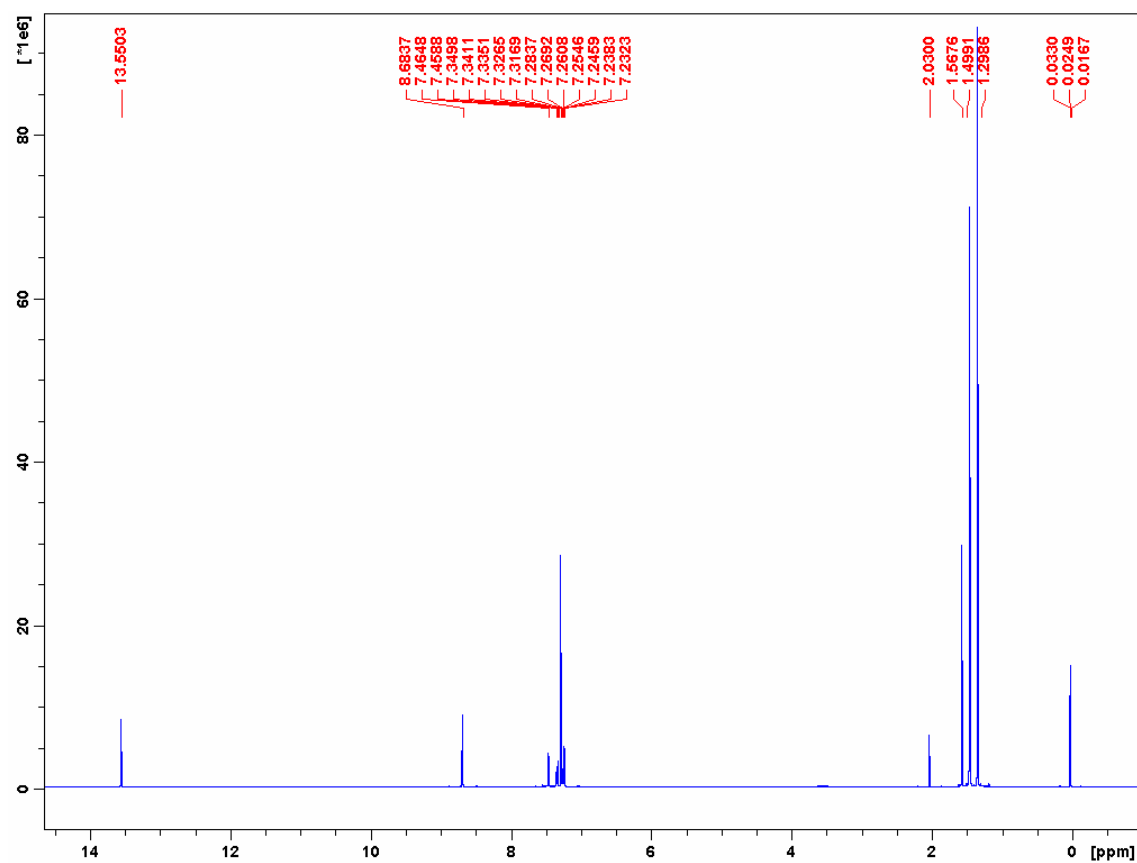

## Typical NMR shifts ( $d_6$ -acetone) upon demetalation of complex **1a** in the presence of purine **3** and imidazole **5a**.

For the reaction that involved purine, the product after isolation is presented. For the other three spectra the product(s) after 4 h are presented. For all samples both the full spectra as well as the *t*-Bu regions are given. In order to establish a reliable conversion of **1a** into **2**, NMR signal integration was carried out in the *t*-Bu region.

Full spectra:

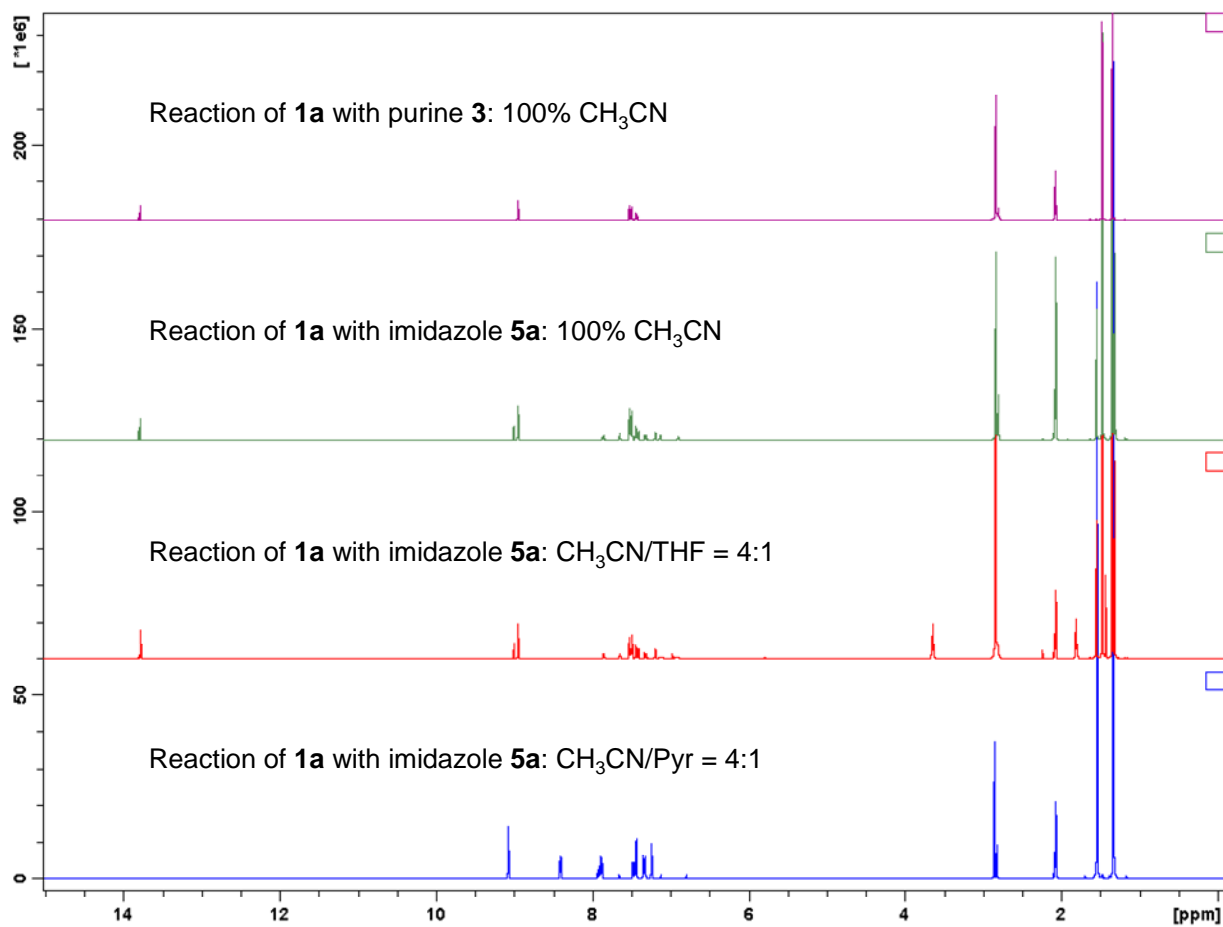

Enlarged *t*-Bu region of the NMR spectra:

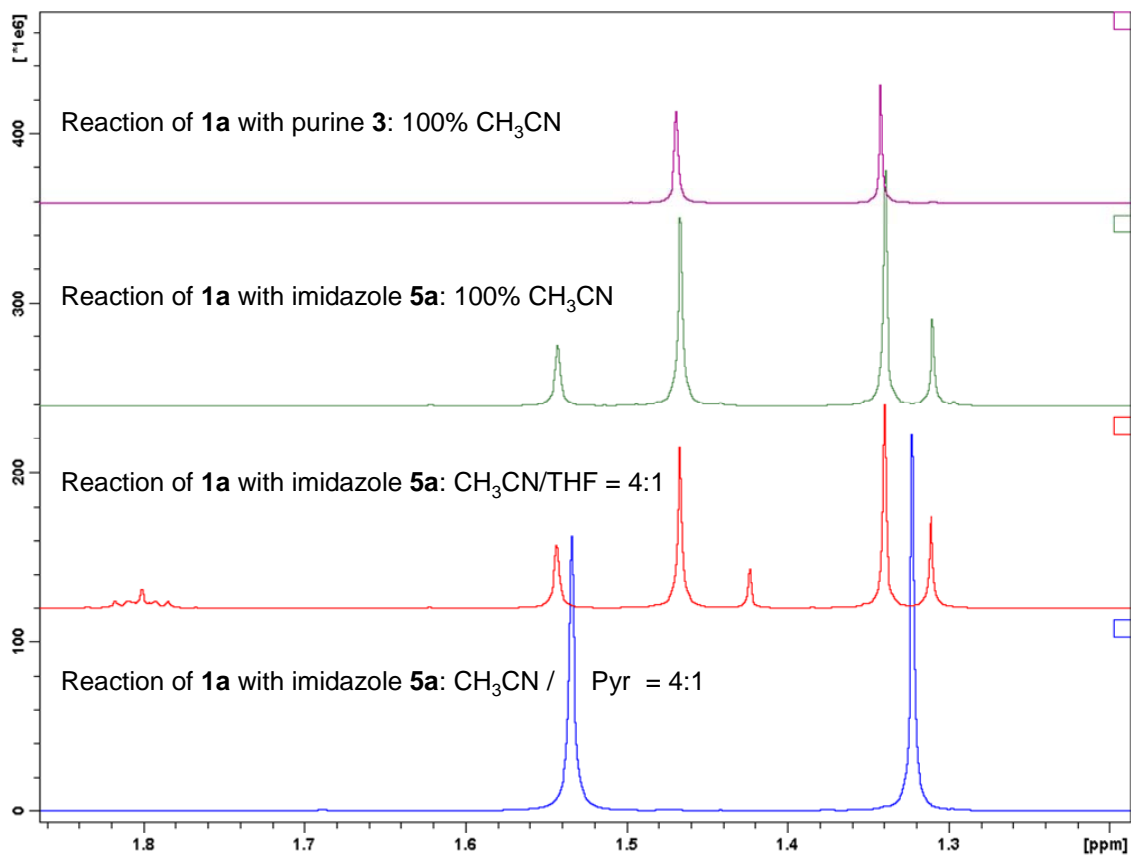

Please note the small changes in shifts of the *t*-Bu resonances for the isolated reaction product in the presence of pyridine; in this case the 1:1 assembly **1a**·pyridine was identified, and the coordination of pyridine to the Zn metal center causes small changes in the magnetic environment of the *t*-Bu groups within the assembly.

Assignments:

$\delta = 1.47, 1.34$  ppm; compound **2**

$\delta = 1.55, 1.31$  ppm; compound **1a**

Literature pKa data for a series of N-heterocyclic compounds<sup>3-6</sup>

| Compound                   | pKa (H <sub>2</sub> O) | pKa (dmso) |
|----------------------------|------------------------|------------|
| H <sub>2</sub> O           | 15.7                   | 32         |
| Phenol                     | 9.95                   | 18.0       |
| Indole                     |                        | 20.95      |
| Benzimidazole              | 6.0                    | 16.4       |
| Imidazole                  |                        | 18.6       |
| 2-Me-imidazole             | 7.75                   |            |
| 2-Me-benzimidazole         | 6.1                    |            |
| 2-Me-pyridine <sup>1</sup> | 5.94                   |            |
| Pyridine <sup>1</sup>      | 5.14                   |            |
| Purine                     | 2.39                   |            |
| MeOH                       | 15.5                   | 27.9       |
| CH <sub>3</sub> CN         |                        | 31.3       |

<sup>1</sup> Of the corresponding pyridinium derivative.

<sup>3</sup> [http://daecr1.harvard.edu/pdf/evans\\_pKa\\_table.pdf](http://daecr1.harvard.edu/pdf/evans_pKa_table.pdf)

<sup>4</sup> Lailach, G. E.; Thompson, T. D.; Brindley, G. W. *Clays and Clay Minerals* **1968**, *16*, 285.

<sup>5</sup> [http://research.chem.psu.edu/brpgroup/pKa\\_compilation.pdf](http://research.chem.psu.edu/brpgroup/pKa_compilation.pdf)

<sup>6</sup> [www.chem.wisc.edu/areas/reich/pkatable](http://www.chem.wisc.edu/areas/reich/pkatable)

Full  $^1\text{H}$  NMR spectra ( $\text{d}_6$ -acetone) of compounds **1a·4b**, **1a·5b** and **1a·7**.

In order of mentioning:

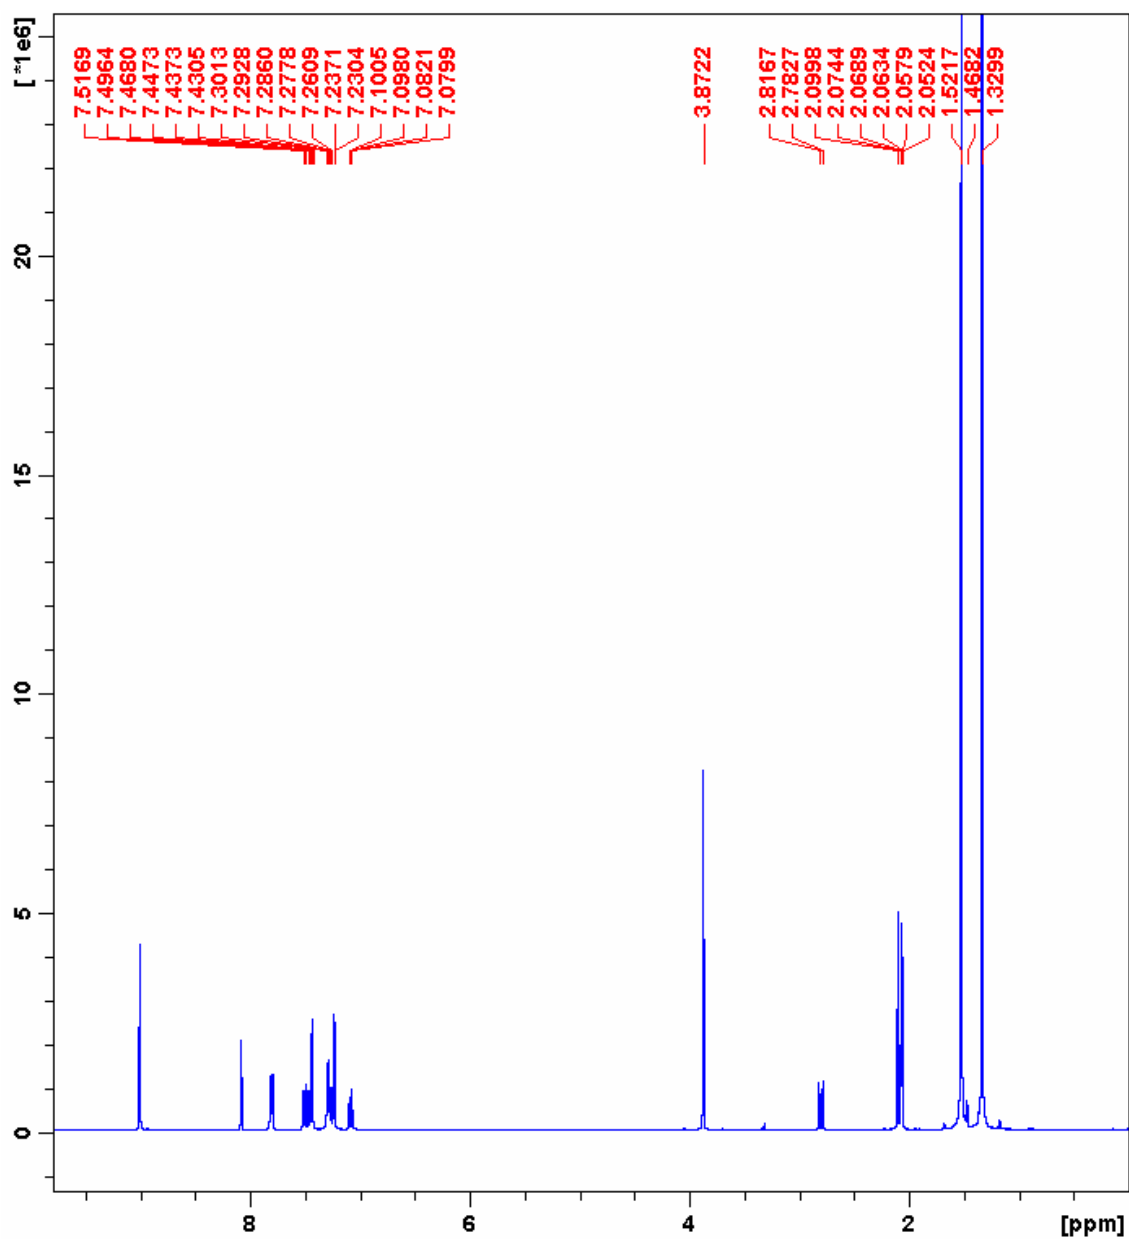

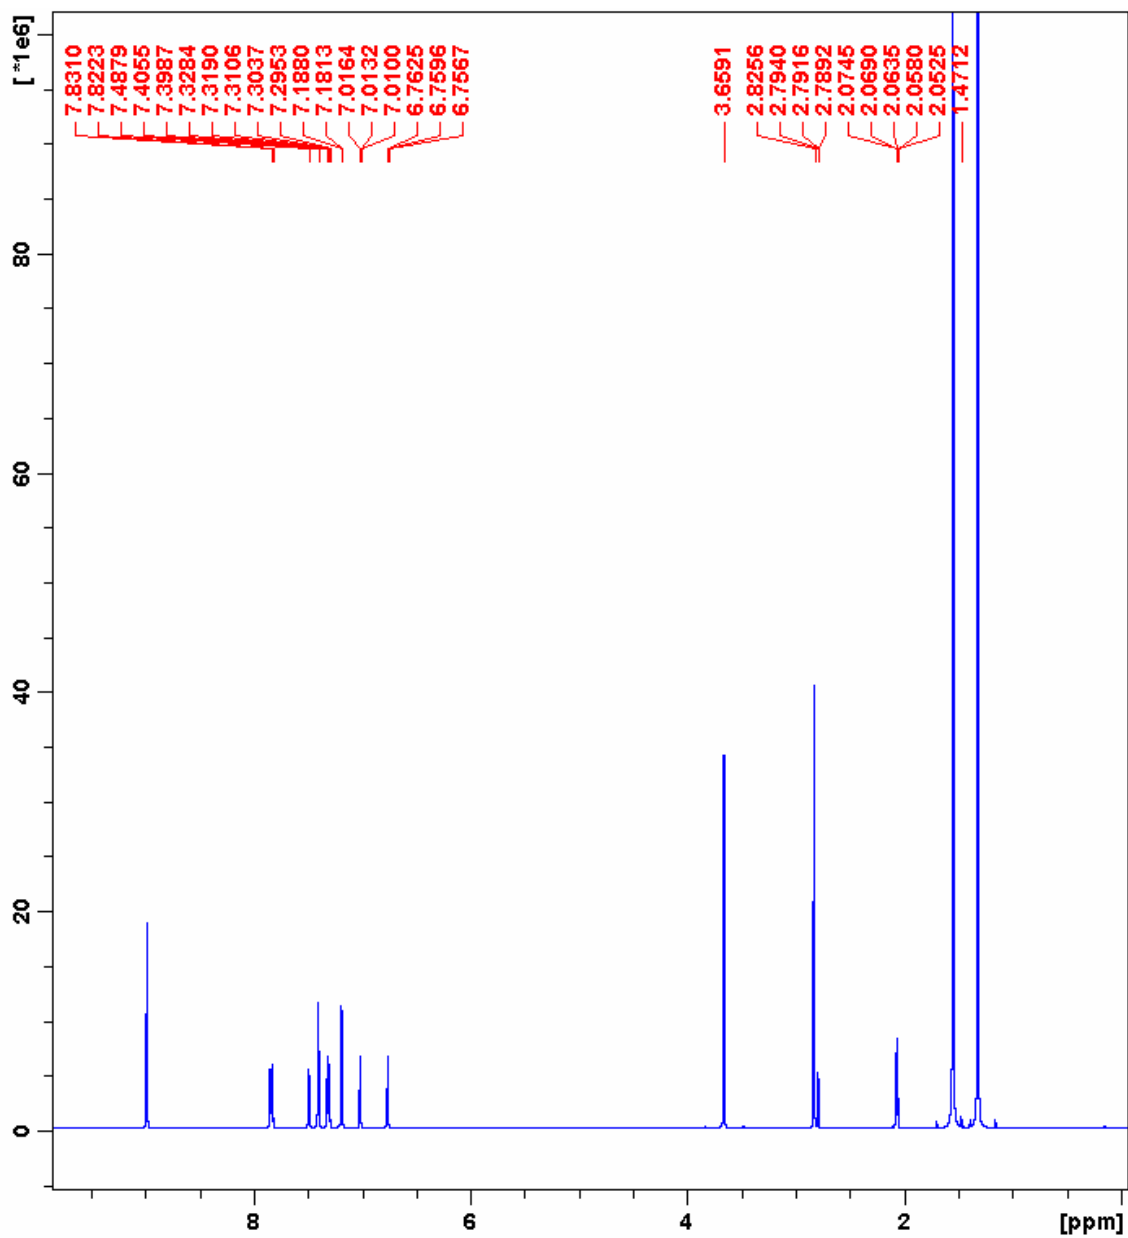

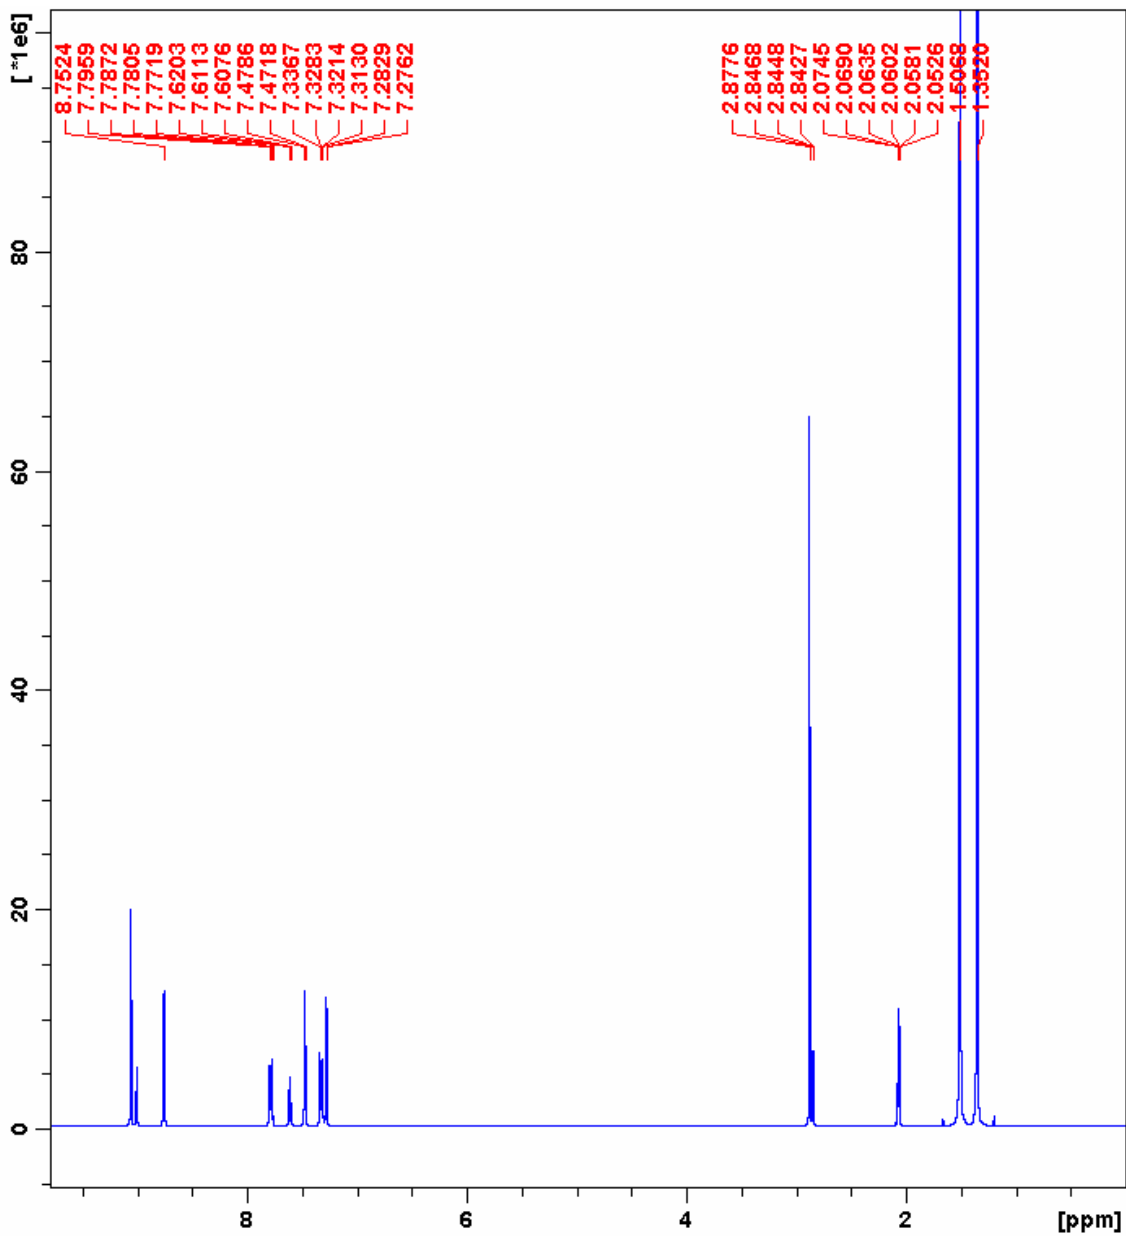



Typical procedure involving complexes **1** and the N-heterocycles **3-7**.

**Typical procedure for the reaction of complexes 1a-c with the N-heterocycles.** A mixture of Zn(salphen) **1a** (61.3 mg, 0.101 mmol) and imidazole **5a** (13.0 mg, 0.191 mmol) in acetonitril (6 mL) was heated in a glass vial until all solids had dissolved. After cooling to ambient temperature the mixture was left unstirred for 4 h, and then a homogenized sample was taken for  $^1\text{H}$  NMR analysis. The solvent was removed in vacuo and the residue dissolved in the appropriate NMR solvent directly followed by analysis. Data for **1a**:  $^1\text{H}$  NMR (400 MHz,  $d_6$ -acetone):  $\delta$  = 9.10 (s, 2H), 7.94-7.91 (m, 2H), 7.45 (d,  $^4J$  = 2.7 Hz, 2H), 7.37-7.35 (m, 2H), 7.26 (d,  $^4J$  = 2.7 Hz, 2H), 1.55 (s, 18H), 1.34 (s, 18H). MS (MALDI-TOF, positive mode)  $m/z$  603.3 (M+H) $^+$ . Data for **1b**:  $^1\text{H}$  NMR (400 MHz,  $\text{CDCl}_3$ ):  $\delta$  = 8.24 (s, 2H), 7.73-7.70 (m, 2H), 7.43 (d,  $^4J$  = 2.0 Hz, 2H), 7.21-7.19 (m, 2H), 7.11 (d,  $^4J$  = 2.0 Hz, 2H), 1.49 (s, 18H), 1.34 (s, 18H). Data for **1c**:  $^1\text{H}$  NMR (400 MHz,  $d_6$ -acetone):  $\delta$  = 9.35 (s, 2H), 8.32-8.29 (m, 2H), 7.49 (d,  $^4J$  = 2.6 Hz, 2H), 7.42 (d,  $^4J$  = 2.6 Hz, 2H), 7.35-7.32 (m, 2H), 1.57 (s, 18H), 1.35 (s, 18H). Data for **2**:  $^1\text{H}$  NMR (400 MHz,  $d_6$ -acetone):  $\delta$  = 13.78 (s, 2H), 8.95 (s, 2H), 7.52-7.48 (m, 6H), 7.44-7.42 (m, 2H), 1.47 (s, 18H), 1.34 (s, 18H). MS (MALDI-TOF, negative mode)  $m/z$  539.4 (M-H) $^-$ .
